# Supplementary material for: Genomic Analysis of Tumor Microenvironment Immune Types across 14 Solid Cancer Types: Immunotherapeutic Implications
Source: PubMed Central journal article supplement — Theranostics. 2017 Aug 22;7(14):3585–94. doi: 10.7150/thno.21471 (PMC5596445; doi:10.7150/thno.21471), 2017-08-22
Supplement: thnov07p3585s1.pdf [file thnov07p3585s1.pdf]

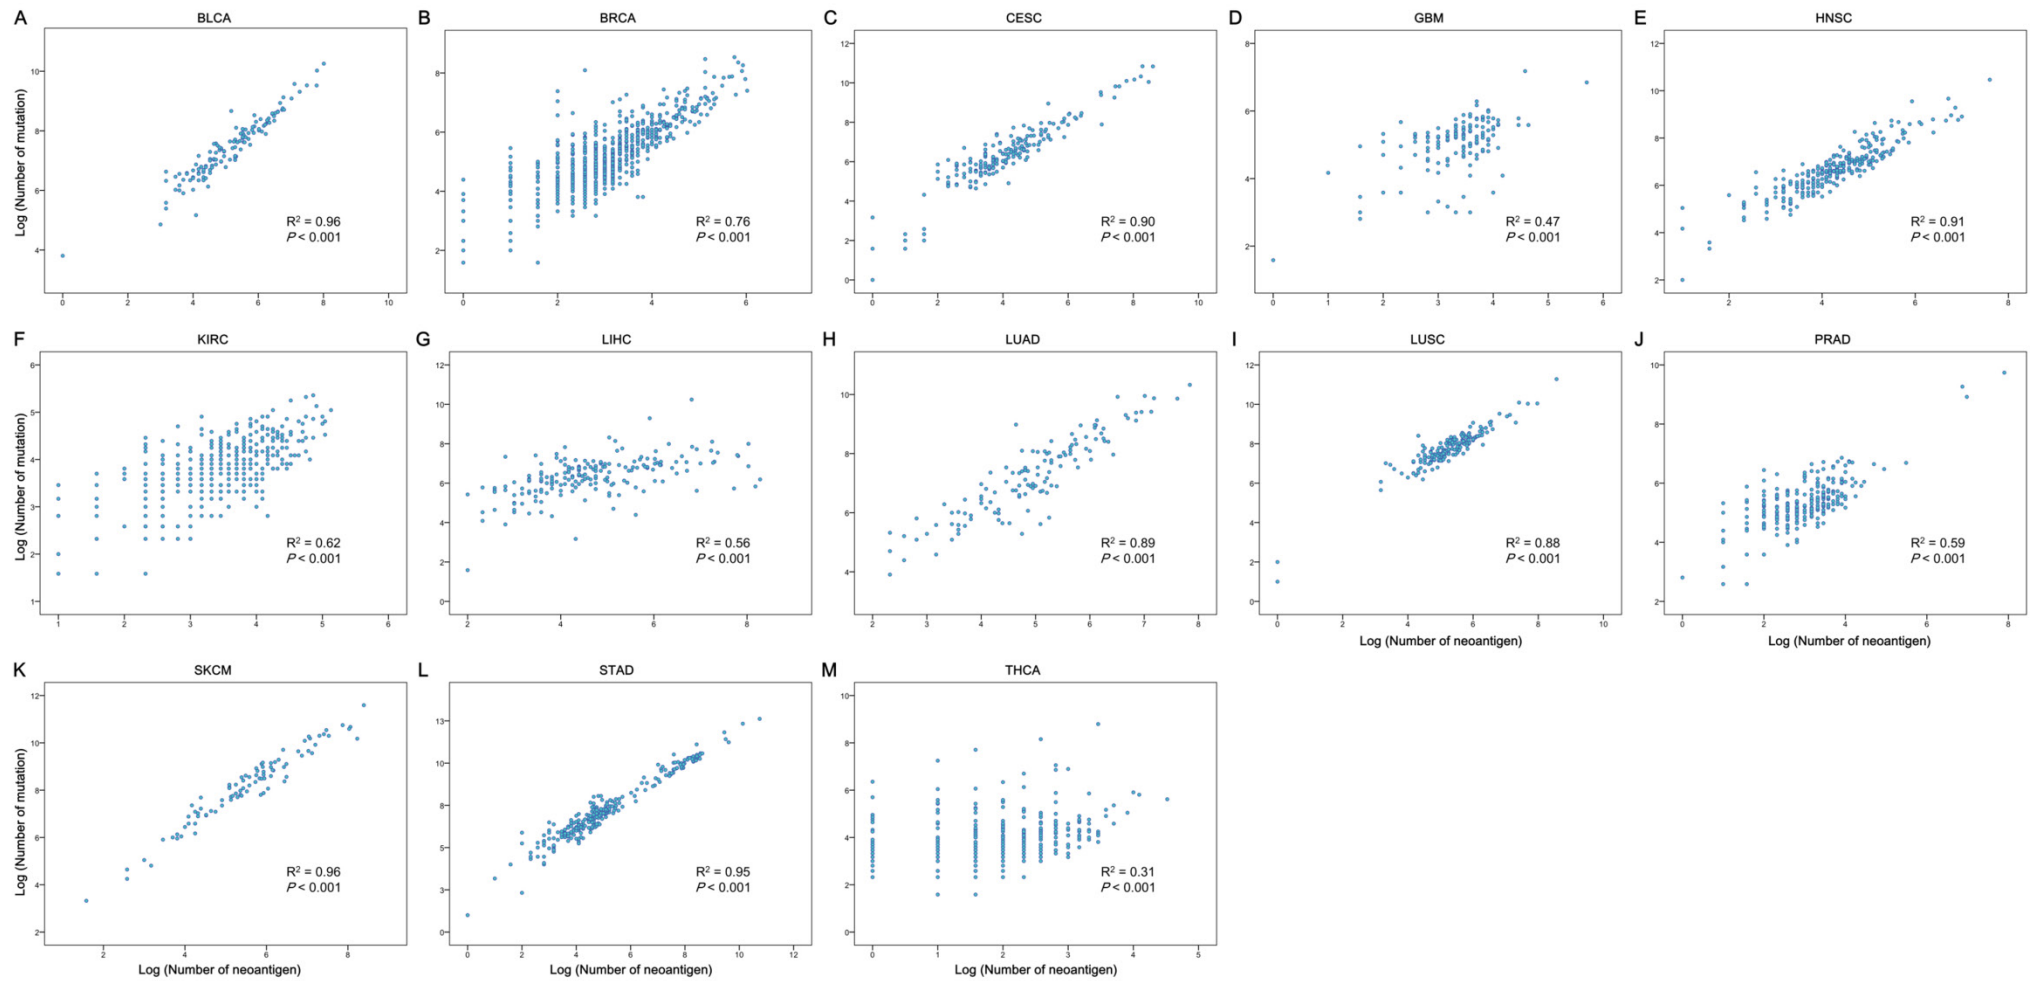

**Supplementary Figure S1. Correlation between mutation burden and neoantigen number.** The number of somatic mutations is significantly correlated with that of neoantigens across all TCGA cancer types.  $R^2$  and  $P$  values are calculated by the Spearman correlation test.

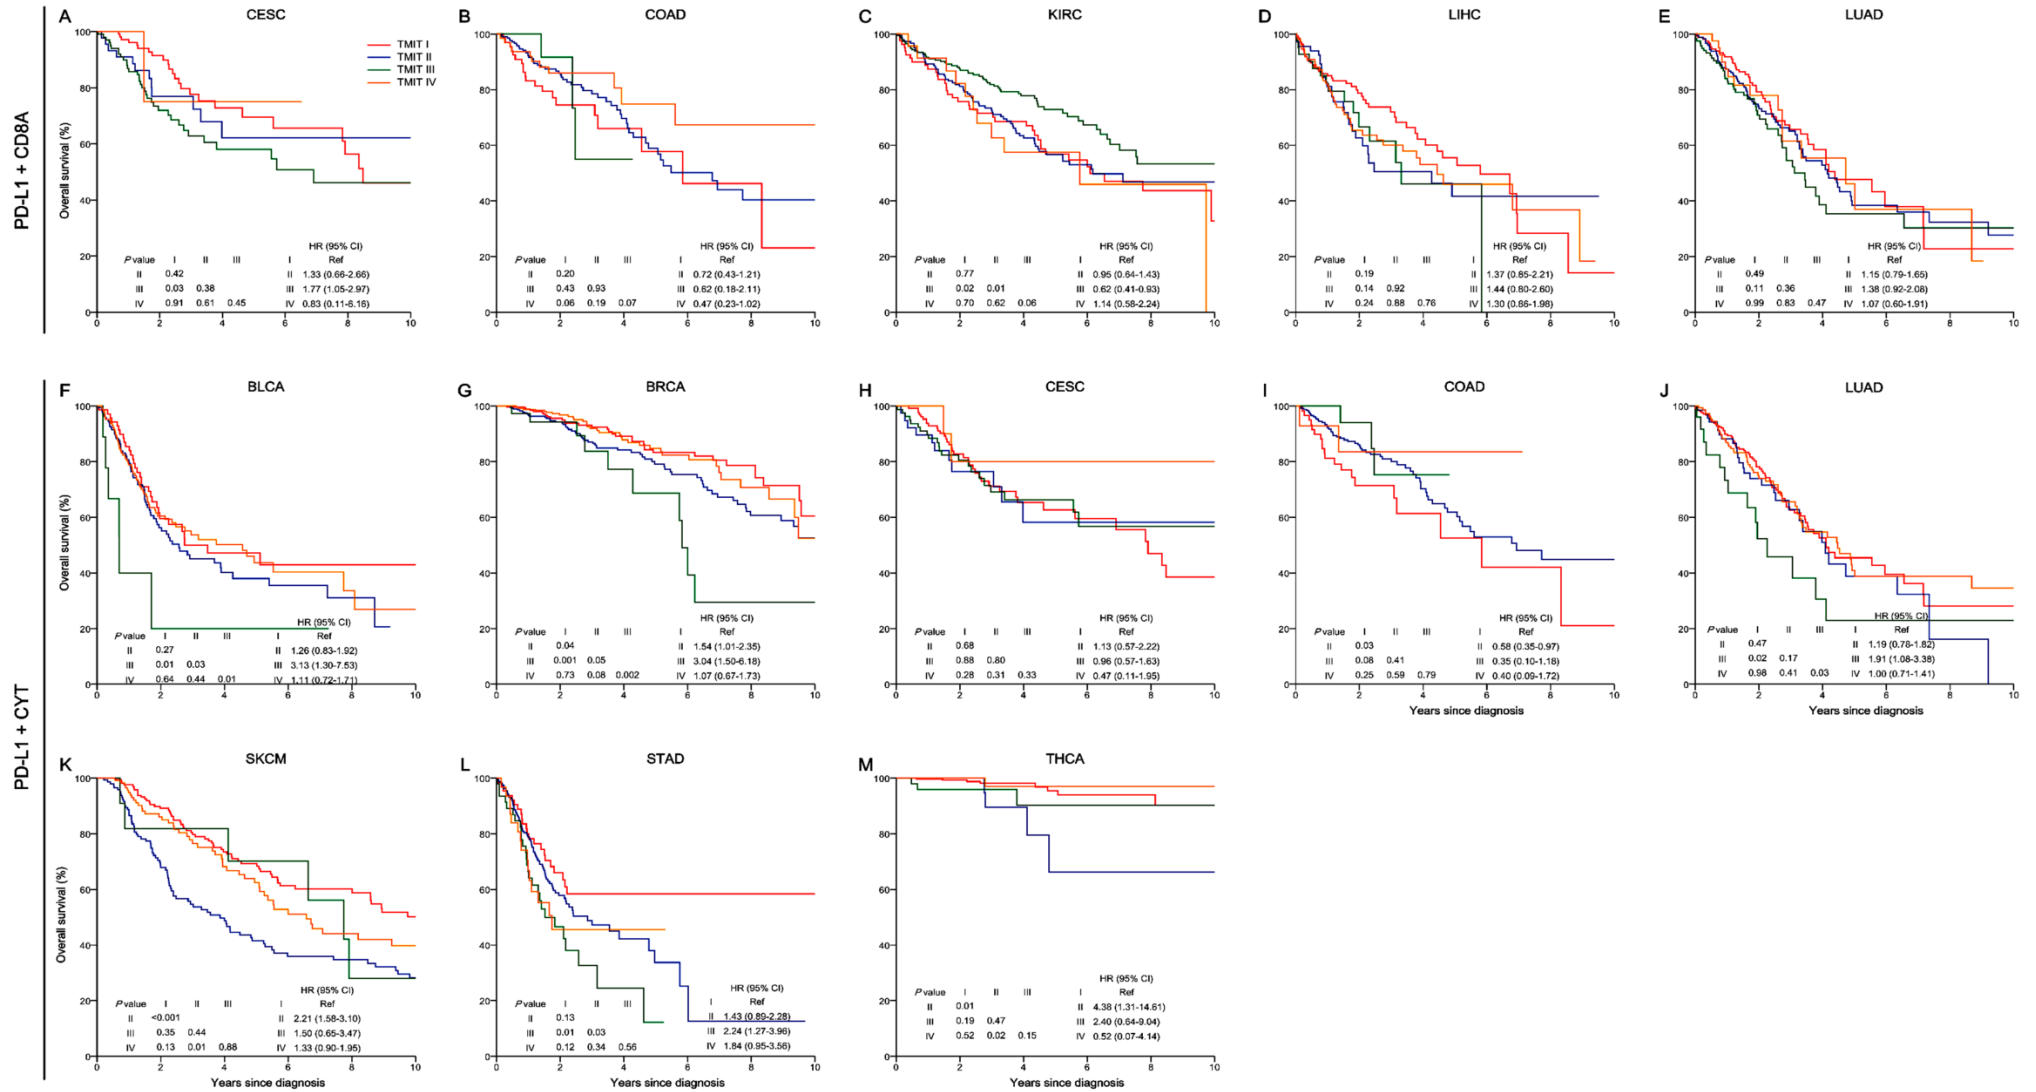

**Supplementary Figure S2. Overall survival analysis according to tumor microenvironment immune types (TMITs) across TCGA cancer types.** Kaplan-Meier plot of overall survival according to TMIT as defined by PD-L1 and CD8A expression in CESC, COAD, KIRC, LIHC, LUAD (A–E), and by PD-L1 and CYT expression in BLCA, BRCA, CESC, COAD, LUAD, SKCM, STAD, and THCA. *P* values are calculated by log-rank test. Hazard ratios (HRs) and corresponding confidence intervals (CIs) of different TMIT types as compared to type I are calculated by Cox proportional hazards model.
