# Supplementary material for: Genomic Analysis of Tumor Microenvironment Immune Types across 14 Solid Cancer Types: Immunotherapeutic Implications
Source: PubMed Central journal article supplement — Theranostics. 2017 Aug 22;7(14):3585–94. doi: 10.7150/thno.21471 (PMC5596445; doi:10.7150/thno.21471), 2017-08-22
Supplement: thnov07p3585s3.pdf [file thnov07p3585s3.pdf]

**Supplementary Table S2. Characteristics of samples in TCGA according to cancer type**

| Characteristic                   | All<br>(N = 6,685)  | BLCA<br>(N = 407)   | BRCA<br>(N = 1,098) | CESC<br>(N = 303)   | COAD<br>(N = 382)   | GBM<br>(N = 166)    | HNSC<br>(N = 521)   | KIRC<br>(N = 534)   | LIHC<br>(N = 373)   | LUAD<br>(N = 513)   | LUSC<br>(N = 501)   | PRAD<br>(N = 495)   | SKCM<br>(N = 468)   | STAD<br>(N = 415)   | THCA<br>(N = 509)   |
|----------------------------------|---------------------|---------------------|---------------------|---------------------|---------------------|---------------------|---------------------|---------------------|---------------------|---------------------|---------------------|---------------------|---------------------|---------------------|---------------------|
| Age, median (IQR), yr            | 61<br>(51–70)       | 69<br>(60–76)       | 58<br>(48–67)       | 46<br>(38–56)       | 66<br>(55–75)       | 60<br>(51–69)       | 61<br>(53–69)       | 61<br>(52–70)       | 61<br>(51–69)       | 66<br>(59–73)       | 68<br>(62–73)       | 61<br>(56–66)       | 58<br>(48–71)       | 67<br>(58–73)       | 46<br>(35–58)       |
| Gender, No. (%)                  |                     |                     |                     |                     |                     |                     |                     |                     |                     |                     |                     |                     |                     |                     |                     |
| Male                             | 3,401 (51)          | 300 (74)            | 12 (1)              | 0 (0)               | 207 (55)            | 107 (65)            | 383 (74)            | 345 (65)            | 251 (67)            | 236 (46)            | 370 (74)            | 494 (100)           | 290 (62)            | 267 (64)            | 139 (27)            |
| Female                           | 3,266 (49)          | 106 (26)            | 1,085 (99)          | 302 (100)           | 170 (45)            | 58 (35)             | 137 (26)            | 188 (35)            | 121 (33)            | 276 (54)            | 130 (26)            | 0 (0)               | 177 (38)            | 147 (36)            | 369 (73)            |
| OS, median (IQR), mo             | 18<br>(11–32)       | 28<br>(15–55)       | 21<br>(12–41)       | 22<br>(13–38)       | 12<br>(5–18)        | 21<br>(12–39)       | 18<br>(11–32)       | 39<br>(18–63)       | 19<br>(11–36)       | 22<br>(14–37)       | 22<br>(11–42)       | 31<br>(17–48)       | 37<br>(16–80)       | 14<br>(8–25)        | 31<br>(17–50)       |
| No. of mutations, median (IQR)   | 50<br>(23–129)      | 168<br>(102–277)    | 33<br>(21–59)       | 82<br>(49–140)      | 53<br>(39–87)       | 36<br>(27–45)       | 102<br>(65–148)     | 14<br>(10–18)       | 82<br>(54–120)      | 157<br>(81–292)     | 219<br>(160–296)    | 37<br>(29–51)       | 279<br>(124–528)    | 118<br>(68–265)     | 16<br>(10–27)       |
| No. of neoantigens, median (IQR) | 11<br>(6–22)        | 25<br>(16–46)       | 7<br>(4–11)         | 15<br>(9–25)        | --                  | 10<br>(7–13)        | 18<br>(11–27)       | 10<br>(7–15)        | 20<br>(12–32)       | 28<br>(16–48)       | 36<br>(25–51)       | 7<br>(4–10)         | 33<br>(16–56)       | 22<br>(13–29)       | 3<br>(2–5)          |
| Log2 (PD-L1 RSEM), median (IQR)  | 4.94<br>(3.73–6.15) | 4.32<br>(3.12–6.21) | 4.38<br>(3.55–5.27) | 5.73<br>(4.40–7.03) | 4.12<br>(3.23–5.30) | 4.94<br>(4.14–5.89) | 6.35<br>(5.25–7.47) | 5.38<br>(4.73–6.05) | 3.20<br>(2.37–3.98) | 5.98<br>(4.98–6.89) | 6.22<br>(5.22–7.59) | 3.23<br>(2.47–3.86) | 4.67<br>(3.52–6.00) | 5.30<br>(4.40–6.14) | 5.63<br>(4.50–6.44) |
| Log2 (CD8A RSEM), median (IQR)   | 7.23<br>(5.99–8.56) | 6.37<br>(4.82–7.87) | 7.27<br>(6.21–8.35) | 7.73<br>(6.59–9.03) | 6.32<br>(5.09–7.37) | 5.40<br>(4.58–6.40) | 7.29<br>(5.80–8.69) | 8.70<br>(7.7–9.92)  | 6.03<br>(4.94–7.34) | 7.95<br>(6.97–8.92) | 7.70<br>(6.73–8.75) | 6.66<br>(5.87–7.37) | 7.74<br>(5.79–9.62) | 7.83<br>(6.51–8.86) | 6.86<br>(5.92–7.97) |
| Log2 (CYT RSEM), median (IQR)    | 6.65<br>(5.37–8.00) | 6.22<br>(4.51–7.62) | 6.13<br>(5.03–7.26) | 7.68<br>(6.44–8.75) | 5.22<br>(4.29–6.22) | 5.43<br>(4.19–6.45) | 7.37<br>(6.19–8.51) | 8.46<br>(7.79–9.24) | 6.05<br>(5.05–7.24) | 7.51<br>(6.70–8.47) | 7.39<br>(6.55–8.33) | 5.57<br>(4.82–6.24) | 6.86<br>(5.20–8.58) | 7.05<br>(6.05–8.06) | 5.88<br>(4.99–6.73) |

Abbreviations: BLCA, bladder urothelial carcinoma; BRCA, breast cancer; CESC, cervical cancer; COAD, colon and rectal adenocarcinoma; GBM, glioblastoma multiforme; HNSC, head and neck squamous cell carcinoma; IQR, interquartile range; KIRC, kidney clear cell carcinoma; LIHC, liver hepatocellular carcinoma; LUAD, lung adenocarcinoma; LUSC, lung squamous cell carcinoma; OS, overall survival; PRAD, prostate adenocarcinoma; RSEM, RNA-Seq by Expectation Maximization; SKCM, skin cutaneous melanoma; STAD, stomach adenocarcinoma; TCGA, The Cancer Genome Atlas; THCA, thyroid carcinoma.

**Supplementary Table S3. Distribution of TMITs according to cancer type**

| Cancer type | No. of cases | TMIT (PD-L1 + CD8A), No. (%) |          |          |          | TMIT (PD-L1 + CYT), No. (%) |          |         |          |
|-------------|--------------|------------------------------|----------|----------|----------|-----------------------------|----------|---------|----------|
|             |              | I                            | II       | III      | IV       | I                           | II       | III     | IV       |
| BLCA        | 407          | --                           | --       | --       | --       | 72 (18)                     | 173 (43) | 10 (2)  | 152 (37) |
| BRCA        | 1,098        | --                           | --       | --       | --       | 291 (27)                    | 398 (36) | 40 (4)  | 369 (34) |
| CESC        | 303          | 128 (42)                     | 52 (17)  | 115 (38) | 8 (3)    | 153 (50)                    | 46 (15)  | 90 (30) | 14 (5)   |
| COAD        | 382          | 71 (19)                      | 221 (58) | 25 (7)   | 65 (17)  | 64 (17)                     | 272 (71) | 32 (8)  | 14 (4)   |
| KIRC        | 534          | 84 (16)                      | 189 (35) | 238 (45) | 23 (4)   | --                          | --       | --      | --       |
| LIHC        | 373          | 145 (39)                     | 70 (19)  | 42 (11)  | 116 (31) | --                          | --       | --      | --       |
| LUAD        | 513          | 161 (31)                     | 184 (36) | 123 (24) | 45 (9)   | 257 (50)                    | 72 (14)  | 27 (5)  | 157 (31) |
| SKCM        | 468          | --                           | --       | --       | --       | 175 (37)                    | 151 (32) | 12 (3)  | 130 (28) |
| STAD        | 415          | --                           | --       | --       | --       | 72 (17)                     | 258 (62) | 53 (13) | 32 (8)   |
| THCA        | 509          | --                           | --       | --       | --       | 331 (65)                    | 49 (10)  | 51 (10) | 78 (15)  |

Abbreviations: BLCA, bladder urothelial carcinoma; BRCA, breast cancer; CESC, cervical cancer; COAD, colon and rectal adenocarcinoma; KIRC, kidney clear cell carcinoma; LIHC, liver hepatocellular carcinoma; LUAD, lung adenocarcinoma; SKCM, skin cutaneous melanoma; STAD, stomach adenocarcinoma; THCA, thyroid carcinoma; TMIT, tumor microenvironment immune type.
